# Supplementary material for: A study on the structural features of SELK, an over-expressed protein in hepatocellular carcinoma, by molecular dynamics simulations in a lipid–water system
Source: Royal Society of Chemistry journal article supplement (doi:10.1039/c6mb00469e), 2016-08-08

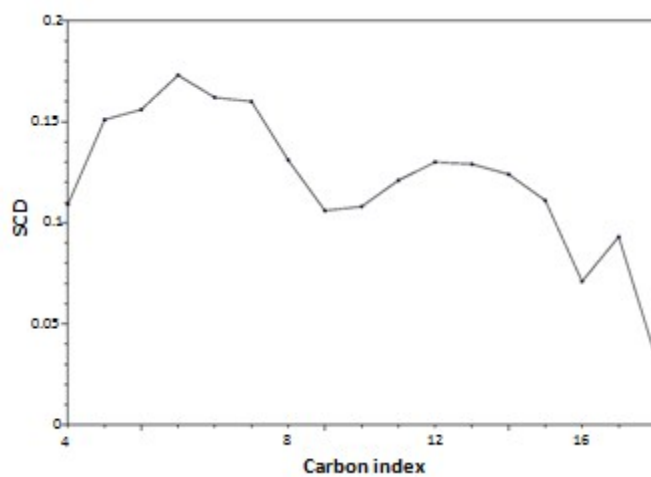

**Figure S1.** The segmental order parameter SCD calculated for the membrane during the MD simulation.

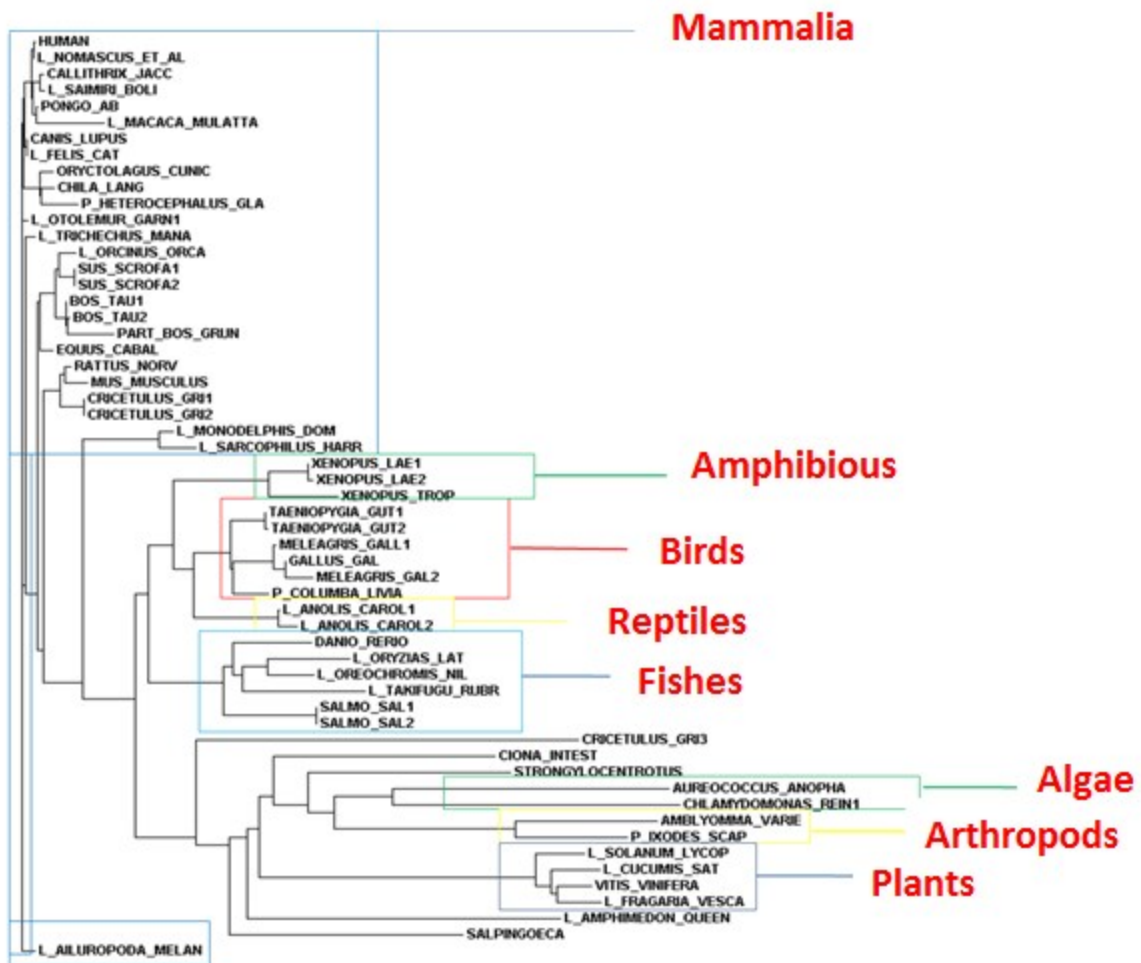

Figure S2. Phylogenetic analysis on SELK sequences from different organisms.

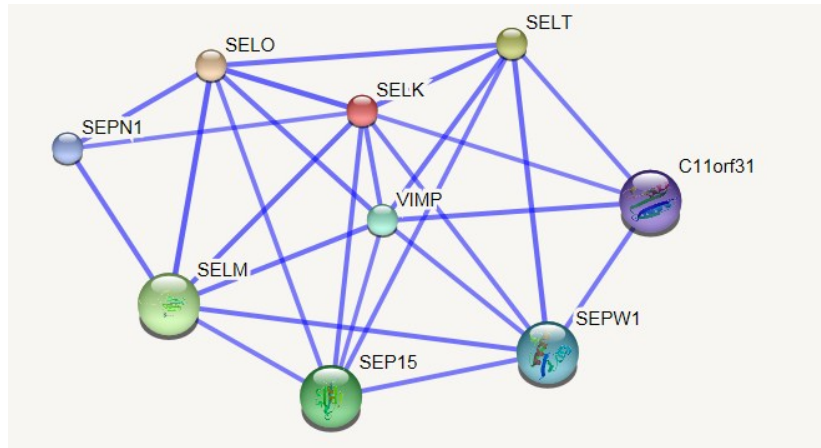

**Figure S3.** Network analysis on SELK performed by STRING (<http://string-db.org/>)

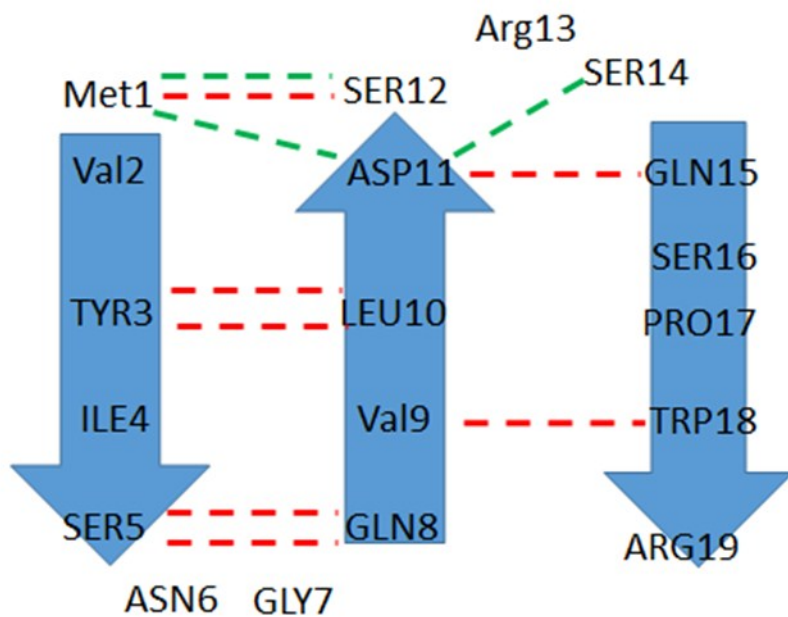

**Figure S4.** Picture of the most compact representation of the N-terminal sheet as suggested by the H-bonds determined during the dynamics. In red the MM-MM H-bonds and in green the H-bonds interacting through the side chains.

**Table S1.**H-bonds and occupancy between the residues present in the N-terminal domain.

| donor      | acceptor   | occupancy |
|------------|------------|-----------|
| MET1-Main  | SER12-Side | 11.16%    |
| TYR3-Main  | LEU10-Main | 8.09%     |
| GLN15-Main | ASP11-Main | 2.70%     |
| SER14-Main | ASP11-Side | 0.67%     |
| SER16-Side | SER14-Main | 0.31%     |
| LEU10-Main | TYR3-Main  | 5.76%     |
| GLN8-Main  | SER5-Main  | 1.10%     |
| SER12-Main | MET1-Main  | 1.23%     |
| TRP18-Main | VAL9-Main  | 7.88%     |
| SER5-Main  | GLN8-Main  | 1.44%     |
| ARG13-Side | SER14-Side | 0.03%     |
| SER14-Side | ASP11-Side | 5.18%     |
| ASP11-Main | SER16-Main | 0.34%     |
| SER16-Main | ASP11-Main | 0.06%     |
| TRP18-Side | ASP11-Side | 0.12%     |
| MET1-Main  | ASP11-Side | 19.37%    |
| ARG13-Main | ASP11-Side | 0.06%     |
| TRP18-Side | SER14-Side | 0.09%     |
| SER5-Side  | ASN6-Side  | 0.40%     |
| SER16-Side | PRO17-Main | 0.06%     |
| ARG13-Side | ASP11-Side | 93.39%    |
| GLN8-Side  | SER5-Main  | 0.03%     |
| MET1-Main  | TYR3-Side  | 0.03%     |
| GLN8-Side  | ASN6-Main  | 0.03%     |

|            |            |       |
|------------|------------|-------|
| SER14-Main | ASP11-Main | 0.06% |
|------------|------------|-------|

|           |           |       |
|-----------|-----------|-------|
| GLN8-Side | GLY7-Main | 0.18% |
|-----------|-----------|-------|

|            |            |       |
|------------|------------|-------|
| SER14-Side | SER16-Main | 0.03% |
|------------|------------|-------|

**Table S2.**H-bonds and occupancy between the residues of the N-terminal domain and the lipids.

| donor       | acceptor    | occupancy |
|-------------|-------------|-----------|
| ARG19-Side  | POPC4-Side  | 69.27%    |
| ARG19-Side  | POPC11-Side | 69.33%    |
| ARG19-Side  | POPC9-Side  | 86.07%    |
| GLN8-Side   | POPC11-Side | 0.25%     |
| SER16-Side  | POPC3-Side  | 0.25%     |
| ARG19-Main  | POPC3-Side  | 0.06%     |
| POPC17-Side | GLY7-Main   | 0.03%     |
| SER14-Side  | POPC26-Side | 0.78%     |
| ARG13-Side  | POPC27-Side | 0.41%     |
| SER14-Side  | POPC27-Side | 4.17%     |
| ARG13-Side  | POPC20-Side | 15.57%    |

**Table S3.**H-bonds and occupancy between the N-terminal domain and the water molecules.

| donor      | acceptor   | occupancy |
|------------|------------|-----------|
| water-O    | TRP18-Main | 14.82%    |
| water-O    | GLY7-Main  | 8.95%     |
| water-O    | GLN15-Side | 11.46%    |
| water-O    | GLN15-Main | 7.60%     |
| TYR3-Side  | water-O    | 4.77%     |
| water-O    | ARG19-Main | 4.09%     |
| SER14-Side | water-O    | 3.63%     |
| water-O    | ASP11-Side | 28.26%    |
| water-O    | SER14-Main | 6.76%     |
| water-O    | ASN6-Main  | 8.90%     |
| water-O    | SER5-Main  | 3.51%     |
| water-O    | ARG13-Main | 6.65%     |
| water-O    | ILE4-Main  | 7.11%     |
| water-O    | SER14-Side | 2.61%     |
| ASN6-Side  | water-O    | 0.34%     |
| ARG19-Side | water-O    | 2.54%     |
| water-O    | SER5-Side  | 3.07%     |
| ARG13-Side | water-O    | 6.15%     |
| water-O    | PRO17-Main | 7.91%     |
| SER12-Side | water-O    | 5.04%     |
| MET1-Main  | water-O    | 9.62%     |
| water-O    | GLN8-Side  | 9.73%     |
| SER16-Side | water-O    | 4.46%     |
| water-O    | VAL2-Main  | 7.60%     |



|            |            |        |
|------------|------------|--------|
| water-O    | TYR3-Side  | 2.08%  |
| water-O    | SER12-Main | 5.93%  |
| ARG19-Main | water-O    | 0.81%  |
| VAL2-Main  | water-O    | 0.57%  |
| water-O    | SER16-Main | 2.51%  |
| water-O    | ASN6-Side  | 10.70% |
| water-O    | SER16-Side | 3.11%  |
| VAL9-Main  | water-O    | 0.95%  |
| SER5-Side  | water-O    | 3.72%  |
| water-O    | LEU20-Main | 7.82%  |
| LEU20-Main | water-O    | 0.29%  |
| water-O    | GLN8-Main  | 1.35%  |
| ILE4-Main  | water-O    | 0.34%  |
| GLN15-Side | water-O    | 0.52%  |
| GLY7-Main  | water-O    | 0.75%  |
| water-O    | ASP11-Main | 0.08%  |
| water-O    | VAL9-Main  | 0.48%  |
| water-O    | TYR3-Main  | 0.57%  |
| ASN6-Main  | water-O    | 0.70%  |
| GLN8-Side  | water-O    | 0.43%  |
| water-O    | SER12-Side | 1.75%  |
| TRP18-Side | water-O    | 0.21%  |
| water-O    | MET1-Main  | 0.31%  |
| water-O    | LEU10-Main | 0.02%  |
| ASP11-Main | water-O    | 0.41%  |
| water-O    | TRP18-Side | 0.03%  |

**Table S4.**H-bonds and occupancy between the residues present in the TM-helix.

| donor      | acceptor   | occupancy |
|------------|------------|-----------|
| PHE26-Main | LEU22-Main | 9.23%     |
| THR40-Side | LEU36-Main | 40.77%    |
| TRP28-Main | THR24-Main | 1.29%     |
| PHE27-Main | ILE23-Main | 5.18%     |
| PHE38-Main | VAL34-Main | 4.35%     |
| THR40-Main | LEU36-Main | 2.39%     |
| PHE37-Main | PHE33-Main | 12.78%    |
| VAL34-Main | ILE30-Main | 11.86%    |
| GLU32-Main | TRP28-Main | 3.16%     |
| GLY29-Main | ASP25-Main | 2.42%     |
| ALA31-Main | PHE27-Main | 0.92%     |
| LEU41-Main | PHE37-Main | 0.86%     |
| ILE30-Main | PHE26-Main | 4.48%     |
| PHE33-Main | GLY29-Main | 1.38%     |
| LYS39-Main | VAL35-Main | 2.27%     |
| LEU36-Main | GLU32-Main | 0.09%     |
| VAL35-Main | ALA31-Main | 0.43%     |
| SER21-Side | ASP25-Side | 2.45%     |
| THR40-Side | PHE37-Main | 0.06%     |

**Table S5.**H-bonds and occupancy between the residues of the trans-membrane helix and the lipids.

|            |            |        |
|------------|------------|--------|
| LYS39-Side | POPC1-Side | 35.23% |
| THR40-Side | POPC6-Side | 0.02%  |

**Table S6.**H-bonds and occupancy between the residues of the trans-membrane helix and the water molecules.

| donor      | acceptor   | occupancy |
|------------|------------|-----------|
| LYS39-Side | water-O    | 4.17%     |
| water-O    | ASP25-Main | 2.93%     |
| water-O    | THR40-Main | 5.12%     |
| water-O    | SER21-Side | 1.20%     |
| water-O    | LEU42-Main | 4.03%     |
| SER21-Side | water-O    | 3.77%     |
| THR24-Side | water-O    | 2.01%     |
| water-O    | THR40-Side | 0.18%     |
| LEU22-Main | water-O    | 0.72%     |
| water-O    | SER21-Main | 4.86%     |
| water-O    | LYS39-Main | 0.98%     |
| water-O    | PHE38-Main | 2.36%     |
| water-O    | LEU41-Main | 2.48%     |
| water-O    | THR24-Side | 0.93%     |
| water-O    | ILE23-Main | 0.08%     |
| SER21-Main | water-O    | 0.15%     |
| ILE23-Main | water-O    | 0.12%     |
| ASP25-Main | water-O    | 0.02%     |
| THR24-Main | water-O    | 0.03%     |
| water-O    | THR24-Main | 0.02%     |

**Table S7.**H-bonds and occupancy between the residues of theC-terminal region. In details, having used the “all” option, the frequency of interaction may be greater than 100%, because a given residue pair may contain more than one H-bond, each of which is counted separately.

| donor      | acceptor   | occupancy |
|------------|------------|-----------|
| ARG59-Side | ASP61-Side | 120.52%   |
| ARG94-Side | ARG94-Side | 9.99%     |
| ARG59-Side | ARG59-Main | 0.12%     |
| ASN69-Side | SER84-Side | 0.15%     |
| GLY65-Main | SER51-Main | 0.55%     |
| ASN54-Side | LYS48-Main | 0.03%     |
| TYR60-Side | SER56-Main | 0.52%     |
| ARG49-Main | GLN44-Main | 1.23%     |
| ARG64-Side | ASP62-Side | 0.31%     |
| ARG64-Side | ARG50-Main | 2.51%     |
| ASN69-Side | PRO85-Main | 0.12%     |
| GLY53-Main | SER51-Side | 0.06%     |
| TYR52-Side | ASP62-Side | 0.03%     |
| LYS47-Main | GLN43-Main | 1.81%     |
| ARG50-Side | ASP45-Side | 1.59%     |
| LYS48-Main | GLN44-Main | 5.03%     |
| LYS48-Side | GLN44-Side | 0.34%     |
| SER55-Side | CYS92-Main | 2.64%     |
| ARG50-Main | ASP45-Main | 1.04%     |
| MET88-Main | SER55-Side | 2.91%     |
| GLY90-Main | ASP57-Side | 0.55%     |
| GLN43-Side | ASP45-Side | 0.15%     |
| GLY63-Main | ASP62-Side | 0.09%     |

|            |            |        |
|------------|------------|--------|
| ARG49-Side | ASP57-Main | 0.06%  |
| ASN54-Side | GLY53-Main | 0.03%  |
| HSD79-Side | ASN78-Side | 2.05%  |
| TYR60-Side | ARG49-Main | 3.86%  |
| ARG50-Side | ASP45-Main | 0.12%  |
| ARG73-Side | ASP62-Side | 3.37%  |
| ALA89-Main | SER56-Main | 0.67%  |
| ARG76-Main | MET88-Main | 2.15%  |
| ARG81-Side | HSD79-Main | 0.03%  |
| SER51-Side | ASN54-Side | 11.68% |
| ASN69-Side | SER84-Main | 0.12%  |
| SER84-Side | GLY93-Main | 0.12%  |
| ARG73-Side | ASP61-Main | 6.31%  |
| ARG72-Side | PRO71-Main | 17.41% |
| ASN69-Side | PRO66-Main | 0.25%  |
| GLY65-Main | TYR52-Main | 4.90%  |
| ARG64-Side | ARG49-Main | 9.13%  |
| ARG50-Main | VAL46-Main | 0.74%  |
| TYR60-Main | ARG73-Main | 0.18%  |
| ASN78-Side | ARG76-Main | 0.21%  |
| SER51-Main | LYS47-Main | 1.23%  |
| TYR60-Side | ASP57-Main | 0.28%  |
| SER56-Side | GLN44-Main | 0.09%  |
| LYS48-Side | GLN44-Main | 0.18%  |
| SER56-Side | ASP45-Main | 0.09%  |
| ARG73-Side | ASP61-Side | 3.89%  |

|            |            |        |
|------------|------------|--------|
| SER58-Main | ASP57-Side | 0.06%  |
| SER84-Side | GLY68-Main | 0.03%  |
| SER55-Main | CYS92-Main | 0.77%  |
| ARG49-Main | ASP45-Main | 0.77%  |
| ARG72-Side | ASN78-Side | 1.87%  |
| ARG59-Side | ARG73-Main | 0.06%  |
| SER55-Side | GLY91-Main | 2.33%  |
| SER84-Side | PRO83-Main | 0.09%  |
| ARG72-Side | HSD79-Side | 0.03%  |
| SER56-Side | ASP57-Side | 0.12%  |
| GLY90-Main | SER56-Main | 0.46%  |
| ARG64-Side | GLY63-Main | 0.03%  |
| SER55-Side | ARG64-Main | 0.09%  |
| ASN78-Side | ASN78-Main | 0.03%  |
| ALA89-Main | SER58-Main | 0.06%  |
| ARG64-Side | SER51-Main | 1.66%  |
| ARG72-Side | ARG76-Main | 0.74%  |
| SER84-Side | ASN69-Side | 3.28%  |
| LYS48-Side | ASP45-Side | 0.61%  |
| ASN69-Side | PRO67-Main | 0.21%  |
| SER84-Side | PRO85-Main | 0.03%  |
| ARG73-Side | TYR60-Main | 0.61%  |
| ARG72-Side | PRO70-Main | 0.18%  |
| GLY75-Main | ARG72-Main | 0.03%  |
| LYS48-Side | GLY91-Main | 0.18%  |
| ARG49-Side | ASP45-Side | 27.43% |

|            |            |       |
|------------|------------|-------|
| ASN54-Side | CYS92-Main | 0.37% |
| ARG72-Main | ARG64-Main | 4.05% |
| LYS48-Side | ASP57-Side | 0.46% |
| ARG49-Side | ASP57-Side | 0.09% |
| ASN78-Side | ILE77-Main | 0.03% |
| SER56-Side | SER58-Side | 0.06% |
| ARG76-Side | GLY75-Main | 0.06% |
| ALA89-Main | ASP57-Side | 0.06% |



**Table S8.** H-bonds and occupancy between the residues of the C-terminal region and the lipid molecules.

| donor      | acceptor    | occupancy |
|------------|-------------|-----------|
| LYS47-Side | POPC4-Side  | 28.74%    |
| GLN44-Side | POPC18-Side | 0.75%     |
| TYR52-Main | POPC4-Side  | 0.18%     |
| LYS48-Side | POPC18-Side | 0.02%     |
| ARG50-Side | POPC4-Side  | 28.23%    |
| GLY68-Main | POPC14-Side | 0.26%     |
| SER51-Side | POPC4-Side  | 0.40%     |

**Table S9.** H-bonds and occupancy between the residues of the C-terminal region and the water molecules.

| donor      | acceptor   | occupancy |
|------------|------------|-----------|
| ARG73-Side | water-O    | 12.98%    |
| SER51-Side | water-O    | 0.77%     |
| water-O    | ASP61-Side | 63.86%    |
| water-O    | ARG76-Main | 9.33%     |
| water-O    | MET74-Main | 8.32%     |
| water-O    | HSD79-Main | 7.82%     |
| water-O    | ASP62-Side | 85.95%    |
| water-O    | MET88-Main | 11.08%    |
| water-O    | ASP45-Side | 69.09%    |
| water-O    | GLY68-Main | 3.19%     |
| water-O    | LEU80-Main | 10.42%    |
| water-O    | GLY90-Main | 7.17%     |
| water-O    | GLY65-Main | 3.65%     |
| water-O    | GLY91-Main | 7.65%     |
| water-O    | ARG94-Side | 56.38%    |
| water-O    | ASN54-Side | 3.25%     |
| ARG76-Side | water-O    | 13.30%    |
| ARG64-Side | water-O    | 12.83%    |
| ARG94-Side | water-O    | 22.42%    |
| water-O    | ASP61-Main | 8.08%     |
| water-O    | SER84-Main | 8.60%     |
| water-O    | SER56-Side | 3.22%     |
| water-O    | SER55-Main | 1.27%     |
| ARG49-Side | water-O    | 10.88%    |
| water-O    | ARG50-Main | 7.89%     |
| water-O    | GLY93-Main | 5.30%     |
| water-O    | PRO83-Main | 7.88%     |
| water-O    | ASP57-Side | 89.09%    |
| water-O    | ASN69-Side | 9.21%     |
| water-O    | GLN44-Side | 12.18%    |
| water-O    | ARG81-Main | 6.90%     |
| LYS48-Side | water-O    | 8.03%     |
| water-O    | PRO87-Main | 10.28%    |
| ARG81-Side | water-O    | 12.67%    |
| water-O    | ARG64-Main | 4.51%     |
| ARG72-Side | water-O    | 10.41%    |
| water-O    | ILE77-Main | 10.48%    |
| water-O    | ASN78-Side | 8.66%     |
| ARG50-Side | water-O    | 9.29%     |
| water-O    | PRO66-Main | 9.24%     |
| SER56-Side | water-O    | 7.22%     |
| water-O    | GLN43-Side | 11.40%    |
| water-O    | GLY82-Main | 10.84%    |
| water-O    | PRO67-Main | 6.56%     |
| water-O    | SER58-Side | 3.39%     |
| water-O    | LYS47-Main | 1.43%     |
| SER58-Side | water-O    | 6.41%     |
| ARG59-Side | water-O    | 7.34%     |
| TYR52-Side | water-O    | 5.24%     |
| ARG72-Main | water-O    | 0.05%     |
| water-O    | ASN69-Main | 10.21%    |
| water-O    | GLY53-Main | 4.09%     |

|            |            |        |
|------------|------------|--------|
| water-O    | PRO71-Main | 5.62%  |
| LYS47-Side | water-O    | 6.04%  |
| water-O    | ASN78-Main | 9.82%  |
| water-O    | GLY63-Main | 7.85%  |
| water-O    | TYR52-Side | 1.69%  |
| water-O    | TYR52-Main | 1.55%  |
| ASP61-Main | water-O    | 0.49%  |
| water-O    | SER58-Main | 6.11%  |
| water-O    | CYS92-Main | 0.80%  |
| GLY68-Main | water-O    | 1.26%  |
| GLN43-Main | water-O    | 0.61%  |
| water-O    | PRO70-Main | 7.91%  |
| GLN44-Main | water-O    | 0.11%  |
| ILE77-Main | water-O    | 0.35%  |
| water-O    | ARG72-Main | 5.55%  |
| HSD79-Main | water-O    | 0.90%  |
| GLY82-Main | water-O    | 0.06%  |
| ASP57-Main | water-O    | 0.08%  |
| water-O    | GLY75-Main | 9.09%  |
| water-O    | TYR60-Main | 7.92%  |
| water-O    | VAL46-Main | 0.97%  |
| ASN54-Side | water-O    | 0.21%  |
| ARG73-Main | water-O    | 1.66%  |
| water-O    | ARG59-Main | 7.14%  |
| water-O    | HSD79-Side | 2.64%  |
| water-O    | ARG73-Main | 5.21%  |
| water-O    | ASP57-Main | 7.30%  |
| GLY63-Main | water-O    | 0.92%  |
| water-O    | LYS48-Main | 0.09%  |
| water-O    | ALA89-Main | 8.26%  |
| SER84-Side | water-O    | 4.81%  |
| GLY75-Main | water-O    | 0.20%  |
| ASN69-Side | water-O    | 0.28%  |
| water-O    | SER84-Side | 3.40%  |
| ASN69-Main | water-O    | 0.09%  |
| ASP45-Main | water-O    | 0.32%  |
| water-O    | SER56-Main | 4.72%  |
| GLN43-Side | water-O    | 0.43%  |
| water-O    | ASP62-Main | 7.26%  |
| MET74-Main | water-O    | 0.60%  |
| water-O    | PRO85-Main | 6.47%  |
| water-O    | GLN43-Main | 0.06%  |
| water-O    | ASP45-Main | 1.61%  |
| SER58-Main | water-O    | 0.48%  |
| ASN78-Side | water-O    | 0.46%  |
| water-O    | PRO86-Main | 11.56% |
| ASN78-Main | water-O    | 0.28%  |
| TYR52-Main | water-O    | 0.81%  |
| GLY65-Main | water-O    | 0.23%  |
| GLN44-Side | water-O    | 0.43%  |
| water-O    | SER51-Side | 0.81%  |
| ARG81-Main | water-O    | 0.40%  |
| GLY91-Main | water-O    | 0.32%  |
| GLY93-Main | water-O    | 0.72%  |
| CYS92-Main | water-O    | 1.75%  |
| water-O    | GLN44-Main | 0.06%  |
| GLY90-Main | water-O    | 0.38%  |

|            |            |       |
|------------|------------|-------|
| water-O    | SER51-Main | 0.92% |
| LEU80-Main | water-O    | 0.02% |
| HSD79-Side | water-O    | 0.08% |
| water-O    | ARG49-Main | 2.93% |
| water-O    | ASN54-Main | 0.02% |
| ARG64-Main | water-O    | 0.08% |
| ASP62-Main | water-O    | 0.18% |
| water-O    | TYR60-Side | 1.58% |
| TYR60-Side | water-O    | 3.49% |
| ARG76-Main | water-O    | 0.06% |
| SER84-Main | water-O    | 0.02% |
| ALA89-Main | water-O    | 0.28% |
| SER55-Side | water-O    | 4.18% |
| TYR60-Main | water-O    | 0.23% |
| SER56-Main | water-O    | 0.46% |
| ARG94-Main | water-O    | 0.03% |
| ARG59-Main | water-O    | 0.12% |
| MET88-Main | water-O    | 0.15% |
| water-O    | SER55-Side | 0.05% |
| VAL46-Main | water-O    | 0.02% |
| SER55-Main | water-O    | 0.03% |

**Table S10.** RMSD values (expressed in Angstroms) obtained superimposing the five clusters related to three regions of SELK, N-terminal domain (A), trans-membrane helix (B) and C-terminal domain (C).

**A**

|                 | <b>Cluster1</b> | <b>Cluster2</b> | <b>Cluster3</b> | <b>Cluster4</b> | <b>Cluster5</b> |
|-----------------|-----------------|-----------------|-----------------|-----------------|-----------------|
| <b>Cluster1</b> |                 | 0.479           | 1.473           | 1.453           | 2.754           |
| <b>Cluster2</b> |                 |                 | 1.264           | 1.687           | 2.561           |
| <b>Cluster3</b> |                 |                 |                 | 1.297           | 1.977           |
| <b>Cluster4</b> |                 |                 |                 |                 | 1.908           |
| <b>Cluster5</b> |                 |                 |                 |                 |                 |

**B**

|                 | <b>Cluster1</b> | <b>Cluster2</b> | <b>Cluster3</b> | <b>Cluster4</b> | <b>Cluster5</b> |
|-----------------|-----------------|-----------------|-----------------|-----------------|-----------------|
| <b>Cluster1</b> |                 | 0.436           | 0.711           | 0.79            | 1.248           |
| <b>Cluster2</b> |                 |                 | 0.463           | 0.624           | 1.16            |
| <b>Cluster3</b> |                 |                 |                 | 0.569           | 1.04            |
| <b>Cluster4</b> |                 |                 |                 |                 | 1.071           |
| <b>Cluster5</b> |                 |                 |                 |                 |                 |

**C**

|                 | <b>Cluster1</b> | <b>Cluster2</b> | <b>Cluster3</b> | <b>Cluster4</b> | <b>Cluster5</b> |
|-----------------|-----------------|-----------------|-----------------|-----------------|-----------------|
| <b>Cluster1</b> |                 | 1.228           | 1.015           | 2.537           | 3.833           |
| <b>Cluster2</b> |                 |                 | 0.822           | 2.273           | 3.616           |
| <b>Cluster3</b> |                 |                 |                 | 1.941           | 3.452           |
| <b>Cluster4</b> |                 |                 |                 |                 | 2.676           |
| <b>Cluster5</b> |                 |                 |                 |                 |                 |

**Table S11.** Solvent accessibility (ASA) values evaluated for the prolines and the sequence region reported in the literature as involved in the binding with p97(VCP) [12] and DHHC6 [6].

|                  | <b>Cluster1</b> | <b>Cluster2</b> | <b>Cluster3</b> | <b>Cluster4</b> | <b>Cluster5</b> |
|------------------|-----------------|-----------------|-----------------|-----------------|-----------------|
| <b>Pro83</b>     | 0.83            | 0.97            | 0.78            | 0.82            | 0.85            |
| <b>Pro85</b>     | 0.58            | 0.48            | 0.42            | 0.51            | 0.55            |
| <b>Pro86</b>     | 0.07            | 0.08            | 0.11            | 0.13            | 0.44            |
| <b>Pro87</b>     | 0.06            | 0.03            | 0.06            | 0.08            | 0.14            |
| <b>Total ASA</b> | 1.54            | 1.56            | 1.37            | 1.54            | 1.97            |
| <b>Arg64</b>     | 0.38            | 0.28            | 0.23            | 0.34            | 0.17            |
| <b>Gly65</b>     | 0.06            | 0.17            | 0.14            | 0.17            | 0.18            |
| <b>Pro66</b>     | 0.23            | 0.27            | 0.24            | 0.25            | 0.46            |
| <b>Pro67</b>     | 0.92            | 0.93            | 0.95            | 0.86            | 0.86            |
| <b>Gly68</b>     | 0.89            | 0.90            | 0.85            | 0.79            | 1.00            |
| <b>Asn69</b>     | 0.25            | 0.33            | 0.40            | 0.50            | 0.33            |
| <b>Pro70</b>     | 0.47            | 0.51            | 0.59            | 0.69            | 0.42            |
| <b>Total ASA</b> | 3.19            | 3.38            | 3.40            | 3.58            | 3.42            |

**Table S12.** DSSP of the N-terminal during the dynamics in membrane at 0, 3, 6, 9, 12, 15 and 20 ns. Labels: E is for extended strand, participates in  $\beta$  ladder; T for hydrogen bonded turn; B for residue in isolated  $\beta$ -bridge and S for bend. No assigned secondary structure are depicted as “ - ”.

| RES |
|-----|-----|-----|-----|-----|-----|-----|-----|-----|-----|-----|-----|-----|-----|-----|-----|-----|-----|-----|-----|
| 1M  | 2   | 3Y  | 4   | 5S  | 6   | 7G  | 8   | 9V  | 10L | 11  | 12  | 13  | 14  | 15  | 16  | 17P | 18W | 19  | 20  |
| -   | E   | E   | E   | E   | T   | T   | E   | E   | E   | E   | T   | T   | T   | -   | -   | -   | B   | -   | -   |
| -   | E   | E   | E   | E   | T   | T   | E   | E   | E   | E   | T   | T   | T   | T   | E   | E   | -   | -   | -   |
| -   | E   | E   | E   | E   | T   | T   | E   | E   | E   | E   | T   | T   | T   | T   | E   | E   | -   | -   | -   |
| -   | E   | E   | E   | E   | T   | T   | E   | E   | E   | E   | T   | T   | T   | -   | -   | -   | -   | -   | -   |
| -   | E   | E   | E   | E   | T   | T   | E   | E   | E   | E   | T   | T   | T   | -   | S   | -   | -   | -   | -   |
| -   | E   | E   | E   | E   | T   | T   | E   | E   | E   | E   | T   | T   | T   | -   | -   | -   | -   | -   | -   |
| -   | E   | E   | E   | E   | T   | T   | E   | E   | E   | E   | T   | T   | T   | T   | E   | E   | -   | -   | -   |

**Table S13** Average distance in Å between alpha carbons of residues found involved in the formation of the sheet as reported in table 12 S.

| <b>Residue</b> | <b>Counterpart in the sheet</b> | <b>Average Distance Ca - Ca</b> |
|----------------|---------------------------------|---------------------------------|
| <b>Met 1</b>   | <b>Asp 11</b>                   | <b>6.93</b>                     |
| <b>Met 1</b>   | <b>Ser 12</b>                   | <b>6.65</b>                     |
| <b>Tyr 3</b>   | <b>Leu 10</b>                   | <b>5.15</b>                     |
| <b>Ser 5</b>   | <b>Gln 8</b>                    | <b>4.90</b>                     |
| <b>Val 9</b>   | <b>Trp 18</b>                   | <b>4.94</b>                     |
| <b>Asp 11</b>  | <b>Gln 15</b>                   | <b>5.35</b>                     |
| <b>Asp 11</b>  | <b>Arg 13</b>                   | <b>5.30</b>                     |
| <b>Asp 11</b>  | <b>Ser 14</b>                   | <b>5.25</b>                     |



**Table S14.** We report the result of the analysis by ProFunc server that identifies the most likely biochemical function of a protein from its three-dimensional structure on the basis of fold matching, residue conservation, surface cleft analysis, and functional 3D templates. In details, we show **A)** the name of proteins found by ProFunc, the PDB code related to its three dimensional structure and the RMSD value obtained by superimposing its structure with that of N-terminal region in SELK and **B)** the alignment between the N-terminal region of SELK with the two selected PDB proteins, codes 2ho2 and 2dyf, where the localization of b-strands and the coil regions are reported by yellow arrows and violet lines, respectively.

**A**

| ProteinName          | PDB code | RMSD (Å) |
|----------------------|----------|----------|
| human fe65-ww domain | 2ho2     | 1.42Å    |
| ww domain of fbp11   | 2dyf     | 1.79Å    |

**B**

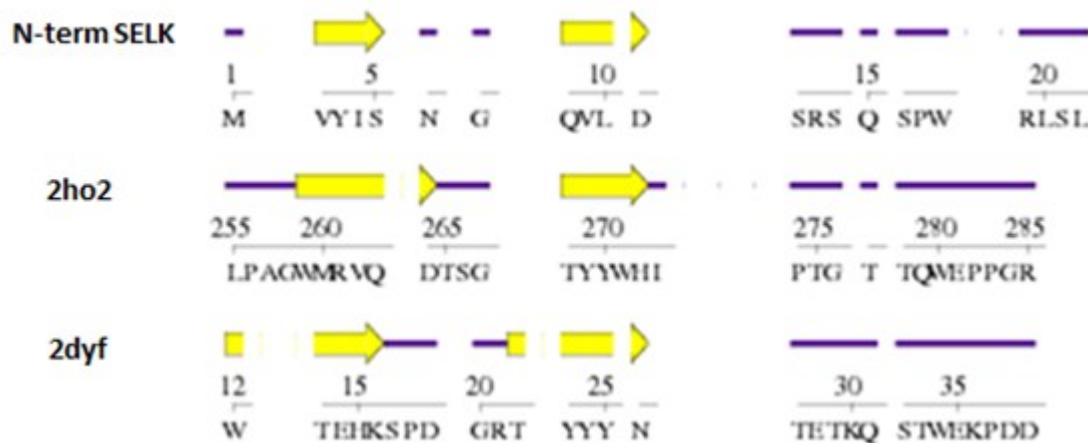

Supplement: c6mb00469e1.pdf [file c6mb00469e1.pdf]
